# Supplementary material
Source: PubMed Central journal article supplement (PMC3173120)
Supplement: supp_M111.249169_jbc.M111.249169-2.pdf [file supp_M111.249169_jbc.M111.249169-2.pdf]

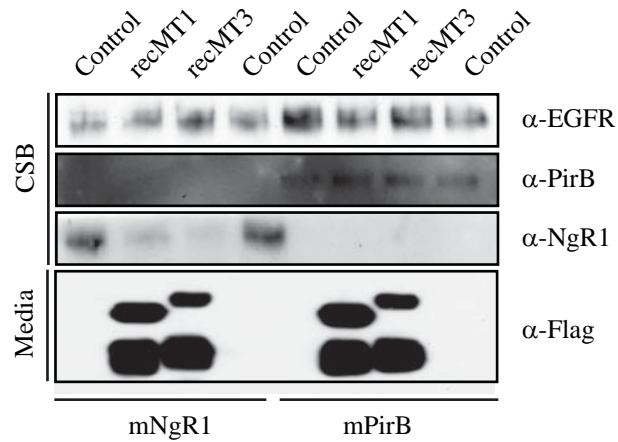

Fig S2. Recombinant MT-MMPs 1 and 3 do not cleave PirB. Western blot analysis of cell surface biotinylated proteins and conditioned media from COS-7 cells transfected with mNgR1 or mPirB and treated with 1  $\mu$ M recombinant MT1-MMP or MT3-MMP for 6 hours. MT1-MMP and MT3-MMP reduce cell surface levels of Ngr1 but not PirB. Endogenous EGFR (epidermal growth factor receptor) is blotted as a control for the cell surface biotinylation. The conditioned media is probed with an anti-FLAG antibody to detect recombinant MMPs.
