# Supplementary material
Source: PubMed Central journal article supplement (PMC3173120)
Supplement: supp_M111.249169_jbc.M111.249169-3.pdf [file supp_M111.249169_jbc.M111.249169-3.pdf]

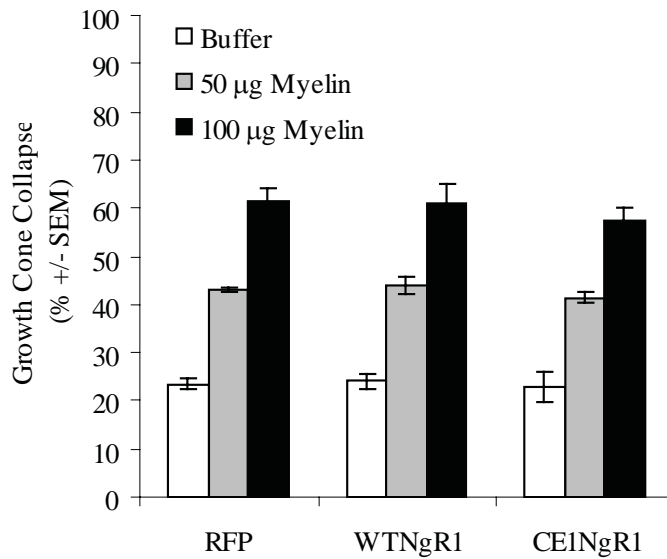

Fig.S3. CE1NgR1 fails to attenuate myelin-dependent growth cone collapse. A. Growth cones of P5 rat DRG explants were transduced with HSVWTNgR1 or HSVCE1NgR1, treated with buffer or myelin extract, and quantified for growth cone collapse. Growth cone collapse quantification is from 3 separate experiments performed in duplicate.
